# Supplementary material for: Strain induced new phase and indirect–direct band gap transition of monolayer InSe
Source: Royal Society of Chemistry journal article supplement (doi:10.1039/c7cp03558f), 2017-01-01
Supplement: c7cp03558f1.pdf [file c7cp03558f1.pdf]

# **Strain induced new Phase and Indirect-Direct Band Gap Transition of Monolayer InSe**

Ting Hu<sup>1</sup>, Jian Zhou<sup>2</sup> and Jinming Dong<sup>3\*</sup>

<sup>1</sup> Department of Applied Physics, Nanjing University of Science and Technology,  
Nanjing, 210094, China

<sup>2</sup> Department of Materials Science and Engineering, Nanjing University, Nanjing  
210093, P. R. China

<sup>3</sup> National Laboratory of Solid State Microstructures and Department of Physics,  
Nanjing University, Nanjing 210093, P. R. China

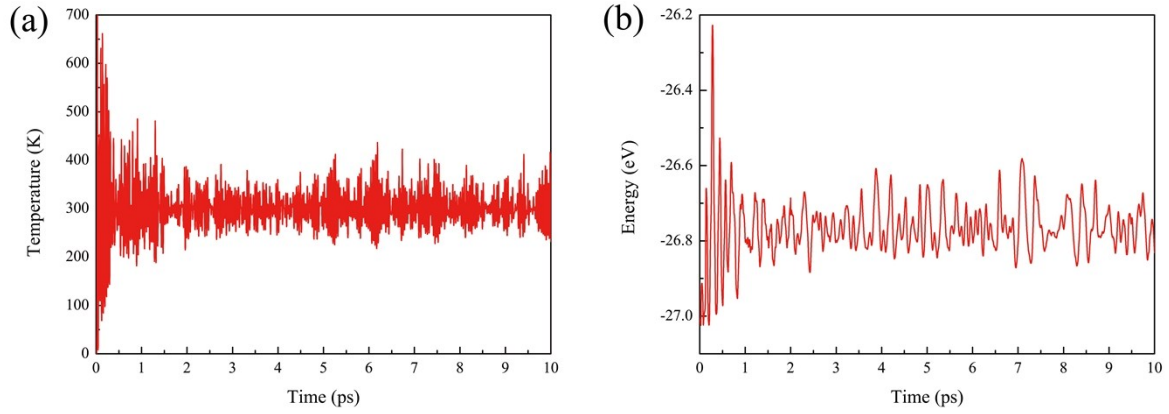

Fig. S1 Fluctuations of (a) temperature and (b) total energy as a function of the molecular dynamics simulation step at 300 K.

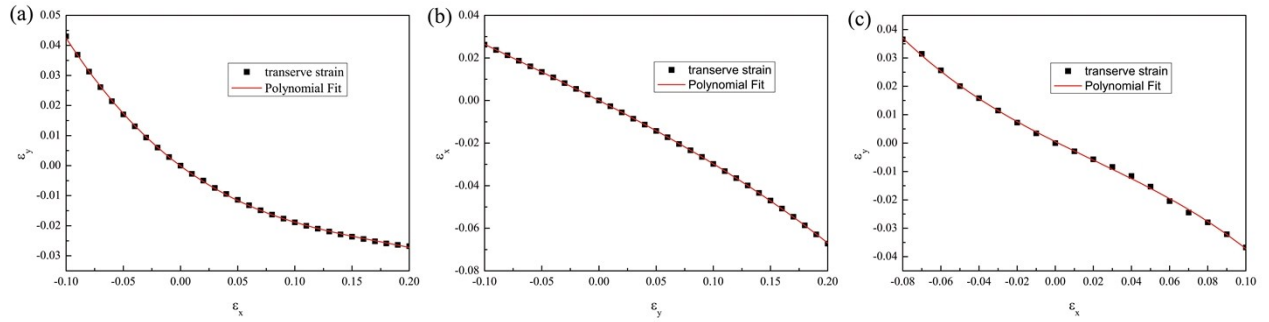

Fig. S2 (a) The in-plane Poisson's ratio  $\epsilon_y$  versus  $\epsilon_x$  under uniaxial strain  $\epsilon_x$  for phase-I InSe. Data are fitted to function  $y = -0.284x + 1.191x^2 - 2.245x^3$ . (b)  $\epsilon_x$  versus  $\epsilon_y$  under uniaxial strain  $\epsilon_y$  for phase-I InSe. Data are fitted to function  $y = -0.274x - 0.169x^2 - 0.672x^3$ . (c)  $\epsilon_y$  versus  $\epsilon_x$  under uniaxial strain  $\epsilon_x$  for phase-II InSe. Data are fitted to function  $y = -0.335x + 0.649x^2 - 10.68x^3$ .

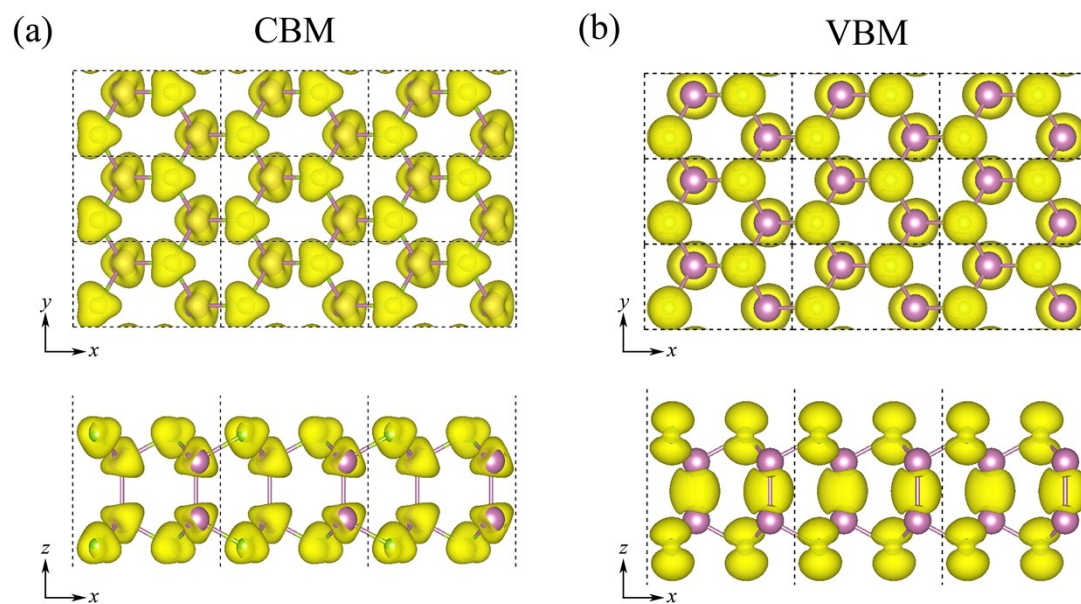

Fig. S3 The partial charge densities of (a) CBM and (b) VBM.
